# Supplementary material for: A Thermal Study on Peat Oxidation Behavior in the Presence of an Iron-Based Catalyst
Source: MDPI journal article supplement (doi:10.3390/catal11111344), 2021-11-09
Supplement: s1 [file s1]

# Supporting Information

## A Thermal Study on Peat Oxidation Behavior in The Presence of Iron-Based Catalyst

Mohammed A. Khelkhal,<sup>1,\*</sup> Semen E. Lapuk,<sup>1</sup> Nikita E. Ignashev,<sup>1</sup> Alexey A. Eskin,<sup>1</sup> Mikhail Yu. Glyavin,<sup>2</sup> Nikolay Yu. Peskov,<sup>2</sup> Tatiana O. Krapivnitskaia<sup>2</sup>, Alexey V. Vakhin<sup>1</sup>

<sup>1</sup> Department of Petroleum Engineering, Kazan Federal University, Kremlevskaya str. 18, 420008 Kazan, Russian Federation; [lapuksemen@gmail.com](mailto:lapuksemen@gmail.com), [Ignashev13nik@mail.ru](mailto:Ignashev13nik@mail.ru), [eskin.aleksey@gmail.com](mailto:eskin.aleksey@gmail.com), [vahin-a\\_v@mail.ru](mailto:vahin-a_v@mail.ru),

<sup>2</sup> Institute of Applied Physics, Russian Academy of Sciences, 46 Ulyanova St., Nizhniy Novgorod, Russia, 603950; [glyavin@appl.sci-nnov.ru](mailto:glyavin@appl.sci-nnov.ru), [peskov@appl.sci-nnov.ru](mailto:peskov@appl.sci-nnov.ru), [kto465@yandex.ru](mailto:kto465@yandex.ru),

\* Correspondence: [amine.khelkhal@gmail.com](mailto:amine.khelkhal@gmail.com); Tel.: +7 (986) 916 39 12

**Table S1.** Kinetic parameters of peat oxidation process in the presence and absence of Iron tallates obtained by the model approach of non-isothermal kinetics during experiments.

| Multi-step model | Model          | Peat oxidation kinetic parameters                                                                               | Catalytic peat oxidation kinetic parameters                                                                    |
|------------------|----------------|-----------------------------------------------------------------------------------------------------------------|----------------------------------------------------------------------------------------------------------------|
| Fn-Fn            | Fn             | $E=80.9 \text{ kJ}\cdot\text{mole}^{-1}$ ,<br>$\text{LnA}=4.6 \text{ s}^{-1}$ ,<br>$\text{ReactOrder } n=1.70$  | $E=65.7 \text{ kJ}\cdot\text{mole}^{-1}$ ,<br>$\text{LnA}=3.2 \text{ s}^{-1}$ ,<br>$\text{ReactOrder } n=1.5$  |
|                  | Fn             | $E=163.9 \text{ kJ}\cdot\text{mole}^{-1}$ ,<br>$\text{LnA}=9.9 \text{ s}^{-1}$ ,<br>$\text{ReactOrder } n=1.40$ | $E=133.4 \text{ kJ}\cdot\text{mole}^{-1}$ ,<br>$\text{LnA}=7.7 \text{ s}^{-1}$ ,<br>$\text{ReactOrder } n=1.4$ |
|                  | R <sup>2</sup> | 0.99721                                                                                                         | 0.99649                                                                                                        |
|                  | F-test         | 1.665                                                                                                           | 1.228                                                                                                          |
| Fn-Bna           | Fn             | $E=76.3 \text{ kJ}\cdot\text{mole}^{-1}$ ,<br>$\text{LnA}=4.1 \text{ s}^{-1}$ ,<br>$\text{ReactOrder } n=1.45$  | $E=63 \text{ kJ}\cdot\text{mole}^{-1}$ ,<br>$\text{LnA}=2.9 \text{ s}^{-1}$ ,<br>$\text{ReactOrder } n=1.4$    |
|                  | Bna            | $E=132.2 \text{ kJ}\cdot\text{mole}^{-1}$ ,                                                                     | $E=125.7 \text{ kJ}\cdot\text{mole}^{-1}$ ,                                                                    |

|        |                |                                                                                                                                  |                                                                                                                                   |
|--------|----------------|----------------------------------------------------------------------------------------------------------------------------------|-----------------------------------------------------------------------------------------------------------------------------------|
|        |                | LnA=7.7 s <sup>-1</sup> ,<br>ReactOrder n=1.46,<br>AutocatOrder 0.254                                                            | LnA=7.2 s <sup>-1</sup> ,<br>ReactOrder n=1.49,<br>AutocatOrder 0.152                                                             |
|        | R <sup>2</sup> | 0.99833                                                                                                                          | 0.99659                                                                                                                           |
|        | F-test         | 1.000                                                                                                                            | 1.195                                                                                                                             |
| Fn-Cnm | Fn             | E=78.4 kJ·mole <sup>-1</sup> ,<br>LnA=4.3 s <sup>-1</sup> ,<br>ReactOrder n=1.51                                                 | E=64.8 kJ·mole <sup>-1</sup> ,<br>LnA=3.2 s <sup>-1</sup> ,<br>ReactOrder n=1.16                                                  |
|        | Cnm            | E=132.2 kJ·mole <sup>-1</sup> ,<br>LnA=7.1 s <sup>-1</sup> ,<br>ReactOrder n=1.49,<br>AutocatOrder 0.48,<br>AutocatPower m=0.413 | E=110.9 kJ·mole <sup>-1</sup> ,<br>LnA=5.7 s <sup>-1</sup> ,<br>ReactOrder n=1.41,<br>AutocatOrder 0.062,<br>AutocatPower m=0.347 |
|        | R <sup>2</sup> | 0.99829                                                                                                                          | 0.99660                                                                                                                           |
|        | F-test         | 1.020                                                                                                                            | 1.192                                                                                                                             |
|        |                |                                                                                                                                  |                                                                                                                                   |
| Fn-An  | Fn             | E=81.3 kJ·mole <sup>-1</sup> ,<br>LnA=4.6 s <sup>-1</sup> ,<br>ReactOrder n=1.93                                                 | E=67.5 kJ·mole <sup>-1</sup> ,<br>LnA=3.9 s <sup>-1</sup> ,<br>ReactOrder n=1.72                                                  |
|        | An             | E=159.5 kJ·mole <sup>-1</sup> ,<br>LnA=9.6 s <sup>-1</sup> ,<br>Dimension n=0.82                                                 | E=136.5 kJ·mole <sup>-1</sup> ,<br>LnA=7.9 s <sup>-1</sup> ,<br>Dimension n=0.76                                                  |
|        | R <sup>2</sup> | 0.99595                                                                                                                          | 0.99584                                                                                                                           |
|        | F-test         | 2.415                                                                                                                            | 1.455                                                                                                                             |
| Bna-Fn | Bna            | E=82 kJ·mole <sup>-1</sup> ,<br>LnA=4.7 s <sup>-1</sup> ,<br>ReactOrder n=1.7,<br>AutocatOrder 0.01                              | E=66 kJ·mole <sup>-1</sup> ,<br>LnA=3.3 s <sup>-1</sup> ,<br>ReactOrder n=1.45,<br>AutocatOrder 0.01                              |
|        | Fn             | E=158.3 kJ·mole <sup>-1</sup> ,<br>LnA=9.5 s <sup>-1</sup> ,                                                                     | E=128.5 kJ·mole <sup>-1</sup> ,<br>LnA=7.3 s <sup>-1</sup> ,                                                                      |

|         |                | ReactOrder n=1.4                                                                                                                  | ReactOrder n=1.39                                                                                                                |
|---------|----------------|-----------------------------------------------------------------------------------------------------------------------------------|----------------------------------------------------------------------------------------------------------------------------------|
|         | R <sup>2</sup> | 0.99722                                                                                                                           | 0.99648                                                                                                                          |
|         | F-test         | 1.660                                                                                                                             | 1.233                                                                                                                            |
| Bna-Bna | Bna            | E=136.2 kJ·mole <sup>-1</sup> ,<br>LnA=9.5 s <sup>-1</sup> ,<br>ReactOrder n=5.9,<br>AutocatOrder 0.01                            | E=68.9 kJ·mole <sup>-1</sup> ,<br>LnA=3.6 s <sup>-1</sup> ,<br>ReactOrder n=1.27,<br>AutocatOrder 0.01                           |
|         | Bna            | E=127.1 kJ·mole <sup>-1</sup> ,<br>LnA=7.1 s <sup>-1</sup> ,<br>ReactOrder n=0.58,<br>AutocatOrder 0.01                           | E=113.3 kJ·mole <sup>-1</sup> ,<br>LnA=6.2 s <sup>-1</sup> ,<br>ReactOrder n=1.3,<br>AutocatOrder 0.013                          |
|         | R <sup>2</sup> | 0.96310                                                                                                                           | 0.99619                                                                                                                          |
|         | F-test         | 21.665                                                                                                                            | 1.334                                                                                                                            |
|         |                |                                                                                                                                   |                                                                                                                                  |
| Bna-Cnm | Bna            | E= 77.9 kJ·mole <sup>-1</sup> ,<br>LnA=4.6 s <sup>-1</sup> ,<br>ReactOrder n=1.53,<br>AutocatOrder 0.01                           | E=65.5 kJ·mole <sup>-1</sup> ,<br>LnA=3.3 s <sup>-1</sup> ,<br>ReactOrder n=1.22,<br>AutocatOrder 0.01                           |
|         | Cnm            | E= 133.8 kJ·mole <sup>-1</sup> ,<br>LnA=7.2 s <sup>-1</sup> ,<br>ReactOrder n=1.48,<br>AutocatOrder 0.53,<br>AutocatPower m=0.373 | E=111.2 kJ·mole <sup>-1</sup> ,<br>LnA=5.9 s <sup>-1</sup> ,<br>ReactOrder n=1.62,<br>AutocatOrder 0.01,<br>AutocatPower m=1.317 |
|         | R <sup>2</sup> | 0.99827                                                                                                                           | 0.99633                                                                                                                          |
|         | F-test         | 1.034                                                                                                                             | 1.287                                                                                                                            |
|         |                |                                                                                                                                   |                                                                                                                                  |
| Bna-An  | Bna            | E=81.3 kJ·mole <sup>-1</sup> ,<br>LnA=4.6 s <sup>-1</sup> ,<br>ReactOrder n=1.93,<br>AutocatOrder 0.01                            | E=66.8 kJ·mole <sup>-1</sup> ,<br>LnA=3.6 s <sup>-1</sup> ,<br>ReactOrder n=0.84,<br>AutocatOrder 0.01                           |

|         |                |                                                                                                                               |                                                                                                                                |
|---------|----------------|-------------------------------------------------------------------------------------------------------------------------------|--------------------------------------------------------------------------------------------------------------------------------|
|         | An             | E=158.3 kJ·mole <sup>-1</sup> ,<br>LnA=9.5 s <sup>-1</sup> ,<br>Dimension n=0.82                                              | E=100.4 kJ·mole <sup>-1</sup> ,<br>LnA=5.2 s <sup>-1</sup> ,<br>Dimension n=0.87                                               |
|         | R <sup>2</sup> | 0.99598                                                                                                                       | 0.99466                                                                                                                        |
|         | F-test         | 2.397                                                                                                                         | 1.868                                                                                                                          |
| Cnm-Fn  | Cnm            | E=82 kJ·mole <sup>-1</sup> ,<br>LnA=4.3 s <sup>-1</sup> ,<br>ReactOrder n=1.67,<br>AutocatOrder 0.04,<br>AutocatPower m=0.01  | E=66.3 kJ·mole <sup>-1</sup> ,<br>LnA=3 s <sup>-1</sup> ,<br>ReactOrder n=1.45,<br>AutocatOrder 0.01,<br>AutocatPower m=0.01   |
|         | Fn             | E=158.5 kJ·mole <sup>-1</sup> ,<br>LnA=9.5 s <sup>-1</sup> ,<br>ReactOrder n=1.39                                             | E=128.4 kJ·mole <sup>-1</sup> ,<br>LnA=7.3 s <sup>-1</sup> ,<br>ReactOrder n=1.39                                              |
|         | R <sup>2</sup> | 0.99723                                                                                                                       | 0.99650                                                                                                                        |
|         | F-test         | 1.656                                                                                                                         | 1.227                                                                                                                          |
| Cnm-Bna | Cnm            | E=77.6 kJ·mole <sup>-1</sup> ,<br>LnA=4.0 s <sup>-1</sup> ,<br>ReactOrder n=1.3,<br>AutocatOrder 0.01,<br>AutocatPower m=0.01 | E=68.4 kJ·mole <sup>-1</sup> ,<br>LnA=3.3 s <sup>-1</sup> ,<br>ReactOrder n=1.28,<br>AutocatOrder 0.01,<br>AutocatPower m=0.01 |
|         | Bna            | E=126.7 kJ·mole <sup>-1</sup> ,<br>LnA=7.3 s <sup>-1</sup> ,<br>ReactOrder n=1.43,<br>AutocatOrder 0.236                      | E=115.3 kJ·mole <sup>-1</sup> ,<br>LnA=6.3 s <sup>-1</sup> ,<br>ReactOrder n=1.34,<br>AutocatOrder 0.035                       |
|         | R <sup>2</sup> | 0.99819                                                                                                                       | 0.99638                                                                                                                        |
|         | F-test         | 1.081                                                                                                                         | 1.271                                                                                                                          |
| Cnm-Cnm | Cnm            | E=76.3 kJ·mole <sup>-1</sup> ,<br>LnA=3.8 s <sup>-1</sup> ,<br>ReactOrder n=1.38,                                             | E=65.3 kJ·mole <sup>-1</sup> ,<br>LnA=3 s <sup>-1</sup> ,<br>ReactOrder n=0.98,                                                |

|        |                |                                                                                                                                  |                                                                                                                                |
|--------|----------------|----------------------------------------------------------------------------------------------------------------------------------|--------------------------------------------------------------------------------------------------------------------------------|
|        |                | AutocatOrder 0.1,<br>AutocatPower m=0.01                                                                                         | AutocatOrder 0.01,<br>AutocatPower m=0.01                                                                                      |
|        | Cnm            | E=129.7 kJ·mole <sup>-1</sup> ,<br>LnA=6.9 s <sup>-1</sup> ,<br>ReactOrder n=1.51,<br>AutocatOrder 0.51,<br>AutocatPower m=0.426 | E=103.4 kJ·mole <sup>-1</sup> ,<br>LnA=5.4 s <sup>-1</sup> ,<br>ReactOrder n=1.5,<br>AutocatOrder 0.01,<br>AutocatPower m=1.7  |
|        | R <sup>2</sup> | 0.99828                                                                                                                          | 0.99604                                                                                                                        |
|        | F-test         | 1.031                                                                                                                            | 1.391                                                                                                                          |
| Cnm-An | Cnm            | E=82.9 kJ·mole <sup>-1</sup> ,<br>LnA=4.4 s <sup>-1</sup> ,<br>ReactOrder n=1.96,<br>AutocatOrder 0.012,<br>AutocatPower m=0.01  | E=66.7 kJ·mole <sup>-1</sup> ,<br>LnA=3.2 s <sup>-1</sup> ,<br>ReactOrder n=0.85,<br>AutocatOrder 0.01,<br>AutocatPower m=0.01 |
|        | An             | E=157.8 kJ·mole <sup>-1</sup> ,<br>LnA=9.5 s <sup>-1</sup> ,<br>Dimension n=0.82                                                 | E=100 kJ·mole <sup>-1</sup> ,<br>LnA=5.1 s <sup>-1</sup> ,<br>Dimension n=88                                                   |
|        | R <sup>2</sup> | 0.99604                                                                                                                          | 0.99478                                                                                                                        |
|        | F-test         | 2.366                                                                                                                            | 1.828                                                                                                                          |
| An-Fn  | An             | E=86.9 kJ·mole <sup>-1</sup> ,<br>LnA=4.9 s <sup>-1</sup> ,<br>Dimension n=0.71                                                  | E=79.4 kJ·mole <sup>-1</sup> ,<br>LnA=4.4 s <sup>-1</sup> ,<br>Dimension n=0.72                                                |
|        | Fn             | E=182 kJ·mole <sup>-1</sup> ,<br>LnA=11.2 s <sup>-1</sup> ,<br>ReactOrder n=1.69                                                 | E=139.3 kJ·mole <sup>-1</sup> ,<br>LnA=8.1 s <sup>-1</sup> ,<br>ReactOrder n=1.52                                              |
|        | R <sup>2</sup> | 0.99503                                                                                                                          | 0.99643                                                                                                                        |
|        | F-test         | 2.965                                                                                                                            | 1.248                                                                                                                          |
| An-Bna | An             | E=83.5 kJ·mole <sup>-1</sup> ,<br>LnA=4.7 s <sup>-1</sup> ,                                                                      | E=75.8 kJ·mole <sup>-1</sup> ,<br>LnA=4.1 s <sup>-1</sup> ,                                                                    |

|        |                |                                                                                                                                 |                                                                                                                                  |
|--------|----------------|---------------------------------------------------------------------------------------------------------------------------------|----------------------------------------------------------------------------------------------------------------------------------|
|        |                | Dimension n=0.82                                                                                                                | Dimension n=0.78                                                                                                                 |
|        | Bna            | E=125.4 kJ·mole <sup>-1</sup> ,<br>LnA=7.2 s <sup>-1</sup> ,<br>ReactOrder n=1.5,<br>AutocatOrder 0.301                         | E=116 kJ·mole <sup>-1</sup> ,<br>LnA=6.4 s <sup>-1</sup> ,<br>ReactOrder n=1.51,<br>AutocatOrder 0.206                           |
|        | R <sup>2</sup> | 0.99822                                                                                                                         | 0.99715                                                                                                                          |
|        | F-test         | 1.062                                                                                                                           | 1.000                                                                                                                            |
| An-Cnm | An             | E=85.1 kJ·mole <sup>-1</sup> ,<br>LnA=4.88 s <sup>-1</sup> ,<br>Dimension n=0.83                                                | E=77.6 kJ·mole <sup>-1</sup> ,<br>LnA=4.1 s <sup>-1</sup> ,<br>Dimension n=0.71                                                  |
|        | Cnm            | E=124.4 kJ·mole <sup>-1</sup> ,<br>LnA=6.3 s <sup>-1</sup> ,<br>ReactOrder n=1.48,<br>AutocatOrder 0.8,<br>AutocatPower m=0.375 | E=124.8 kJ·mole <sup>-1</sup> ,<br>LnA=5.5 s <sup>-1</sup> ,<br>ReactOrder n=1.67,<br>AutocatOrder 1.62,<br>AutocatPower m=0.224 |
|        | R <sup>2</sup> | 0.99824                                                                                                                         | 0.99673                                                                                                                          |
|        | F-test         | 1.053                                                                                                                           | 1.146                                                                                                                            |
| An-An  | An             | E=79.3 kJ·mole <sup>-1</sup> ,<br>LnA=4.3 s <sup>-1</sup> ,<br>Dimension n=0.76                                                 | E=80.4 kJ·mole <sup>-1</sup> ,<br>LnA=4.7 s <sup>-1</sup> ,<br>Dimension n=0.86                                                  |
|        | An             | E=174.6 kJ·mole <sup>-1</sup> ,<br>LnA=10.6 s <sup>-1</sup> ,<br>Dimension n=0.72                                               | E=101.8 kJ·mole <sup>-1</sup> ,<br>LnA=5.3 s <sup>-1</sup> ,<br>Dimension n=0.9                                                  |
|        | R <sup>2</sup> | 0.99190                                                                                                                         | 0.99509                                                                                                                          |
|        | F-test         | 4.822                                                                                                                           | 1.719                                                                                                                            |
| R2-Fn  | R2             | E=62.5 kJ·mole <sup>-1</sup> ,<br>LnA=2.7 s <sup>-1</sup>                                                                       | E=53 kJ·mole <sup>-1</sup> ,<br>LnA=1.9 s <sup>-1</sup>                                                                          |
|        | Fn             | E=112 kJ·mole <sup>-1</sup> ,<br>LnA=6 s <sup>-1</sup> ,                                                                        | E=90.8 kJ·mole <sup>-1</sup> ,<br>LnA=4.5 s <sup>-1</sup> ,                                                                      |

|        |                | ReactOrder n=1.12                                                                                                              | ReactOrder n=1.14                                                                                                            |
|--------|----------------|--------------------------------------------------------------------------------------------------------------------------------|------------------------------------------------------------------------------------------------------------------------------|
|        | R <sup>2</sup> | 0.99101                                                                                                                        | 0.99104                                                                                                                      |
|        | F-test         | 5.348                                                                                                                          | 3.127                                                                                                                        |
| R2-Bna | R2             | E=48.8 kJ·mole <sup>-1</sup> ,<br>LnA=1.2 s <sup>-1</sup>                                                                      | E=46.2 kJ·mole <sup>-1</sup> ,<br>LnA=1.1 s <sup>-1</sup>                                                                    |
|        | Bna            | E=104.8 kJ·mole <sup>-1</sup> ,<br>LnA=5.8 s <sup>-1</sup> ,<br>ReactOrder n=1.6,<br>AutocatOrder 0.5                          | E=91.9 kJ·mole <sup>-1</sup> ,<br>LnA=4.8 s <sup>-1</sup> ,<br>ReactOrder n=1.59,<br>AutocatOrder 0.44                       |
|        | R <sup>2</sup> | 0.98975                                                                                                                        | 0.98945                                                                                                                      |
|        | F-test         | 6.091                                                                                                                          | 3.681                                                                                                                        |
| R2-Cnm | R2             | E=58.6 kJ·mole <sup>-1</sup> ,<br>LnA=2.3 s <sup>-1</sup>                                                                      | E=51.2 kJ·mole <sup>-1</sup> ,<br>LnA=1.7 s <sup>-1</sup>                                                                    |
|        | Cnm            | E=109 kJ·mole <sup>-1</sup> ,<br>LnA=5.5 s <sup>-1</sup> ,<br>ReactOrder n=1.31,<br>AutocatOrder 0.21,<br>AutocatPower m=0.507 | E=94 kJ·mole <sup>-1</sup> ,<br>LnA=4.2 s <sup>-1</sup> ,<br>ReactOrder n=1.3,<br>AutocatOrder 0.42,<br>AutocatPower m=0.252 |
|        | R <sup>2</sup> | 0.99130                                                                                                                        | 0.99055                                                                                                                      |
|        | F-test         | 5.177                                                                                                                          | 3.300                                                                                                                        |
| R2-An  | R2             | E=38.1 kJ·mole <sup>-1</sup> ,<br>LnA=0.2 s <sup>-1</sup>                                                                      | E=58.4 kJ·mole <sup>-1</sup> ,<br>LnA=2.5 s <sup>-1</sup>                                                                    |
|        | An             | E=117.2 kJ·mole <sup>-1</sup> ,<br>LnA=6.3 s <sup>-1</sup> ,<br>Dimension n=1.1                                                | E=104.1 kJ·mole <sup>-1</sup> ,<br>LnA=5.5 s <sup>-1</sup> ,<br>Dimension n=0.79                                             |
|        | R <sup>2</sup> | 0.97573                                                                                                                        | 0.99177                                                                                                                      |
|        | F-test         | 14.323                                                                                                                         | 2.873                                                                                                                        |
| R2-R2  | R2             | E=61.3 kJ·mole <sup>-1</sup> ,                                                                                                 | E=47.6 kJ·mole <sup>-1</sup> ,                                                                                               |

|        |        |                                                                                                                              |                                                                                                                             |
|--------|--------|------------------------------------------------------------------------------------------------------------------------------|-----------------------------------------------------------------------------------------------------------------------------|
|        |        | $\text{LnA}=2.6 \text{ s}^{-1}$                                                                                              | $\text{LnA}=1.4 \text{ s}^{-1}$                                                                                             |
|        | R3     | $E=68.1 \text{ kJ}\cdot\text{mole}^{-1}$ ,<br>$\text{LnA}=2.3 \text{ s}^{-1}$                                                | $E=57 \text{ kJ}\cdot\text{mole}^{-1}$ ,<br>$\text{LnA}=1.4 \text{ s}^{-1}$                                                 |
|        | $R^2$  | 0.96539                                                                                                                      | 0.96558                                                                                                                     |
|        | F-test | 20.306                                                                                                                       | 11.852                                                                                                                      |
| R2-R3  | R2     | $E=61.8 \text{ kJ}\cdot\text{mole}^{-1}$ ,<br>$\text{LnA}=2.67 \text{ s}^{-1}$                                               | $E=49.7 \text{ kJ}\cdot\text{mole}^{-1}$ ,<br>$\text{LnA}=1.6 \text{ s}^{-1}$                                               |
|        | R3     | $E=79.9 \text{ kJ}\cdot\text{mole}^{-1}$ ,<br>$\text{LnA}=3 \text{ s}^{-1}$                                                  | $E=64.5 \text{ kJ}\cdot\text{mole}^{-1}$ ,<br>$\text{LnA}=1.9 \text{ s}^{-1}$                                               |
|        | $R^2$  | 0.97975                                                                                                                      | 0.97990                                                                                                                     |
|        | F-test | 11.968                                                                                                                       | 6.971                                                                                                                       |
| R3-Fn  | R3     | $E=69.5 \text{ kJ}\cdot\text{mole}^{-1}$ ,<br>$\text{LnA}=3.2 \text{ s}^{-1}$                                                | $E=58.8 \text{ kJ}\cdot\text{mole}^{-1}$ ,<br>$\text{LnA}=2.3 \text{ s}^{-1}$                                               |
|        | Fn     | $E=119 \text{ kJ}\cdot\text{mole}^{-1}$ ,<br>$\text{LnA}=6.6 \text{ s}^{-1}$ ,<br>ReactOrder n=1.17                          | $E=97.8 \text{ kJ}\cdot\text{mole}^{-1}$ ,<br>$\text{LnA}=5 \text{ s}^{-1}$ ,<br>ReactOrder n=1.2                           |
|        | $R^2$  | 0.99432                                                                                                                      | 0.99413                                                                                                                     |
|        | F-test | 3.382                                                                                                                        | 2.053                                                                                                                       |
| R3-Bna | R3     | $E=56.1 \text{ kJ}\cdot\text{mole}^{-1}$ ,<br>$\text{LnA}=1.8 \text{ s}^{-1}$                                                | $E=51.4 \text{ kJ}\cdot\text{mole}^{-1}$ ,<br>$\text{LnA}=1.4 \text{ s}^{-1}$                                               |
|        | Bna    | $E=109.9 \text{ kJ}\cdot\text{mole}^{-1}$ ,<br>$\text{LnA}=6.1 \text{ s}^{-1}$ ,<br>ReactOrder n=1.55,<br>AutocatOrder 0.439 | $E=96.8 \text{ kJ}\cdot\text{mole}^{-1}$ ,<br>$\text{LnA}=5.1 \text{ s}^{-1}$ ,<br>ReactOrder n=1.51,<br>AutocatOrder 0.381 |
|        | $R^2$  | 0.99452                                                                                                                      | 0.99391                                                                                                                     |
|        | F-test | 3.263                                                                                                                        | 2.131                                                                                                                       |
| R3-Cnm | R3     | $E=64.9 \text{ kJ}\cdot\text{mole}^{-1}$ ,<br>$\text{LnA}=2.7 \text{ s}^{-1}$                                                | $E=52.8 \text{ kJ}\cdot\text{mole}^{-1}$ ,<br>$\text{LnA}=1.6 \text{ s}^{-1}$                                               |



|       |                |                                                                                                                                 |                                                                                                                                 |
|-------|----------------|---------------------------------------------------------------------------------------------------------------------------------|---------------------------------------------------------------------------------------------------------------------------------|
|       | Cnm            | E=112.8 kJ·mole <sup>-1</sup> ,<br>LnA=5.6 s <sup>-1</sup> ,<br>ReactOrder n=1.34,<br>AutocatOrder 0.51,<br>AutocatPower m=0.36 | E=98.3 kJ·mole <sup>-1</sup> ,<br>LnA=3.6 s <sup>-1</sup> ,<br>ReactOrder n=1.51,<br>AutocatOrder 1.46,<br>AutocatPower m=0.367 |
|       | R <sup>2</sup> | 0.99512                                                                                                                         | 0.99419                                                                                                                         |
|       | F-test         | 2.911                                                                                                                           | 2.032                                                                                                                           |
| R3-An | R3             | E=72 kJ·mole <sup>-1</sup> ,<br>LnA=3.4 s <sup>-1</sup>                                                                         | E=62.8 kJ·mole <sup>-1</sup> ,<br>LnA=2.7 s <sup>-1</sup>                                                                       |
|       | An             | E=117.1 kJ·mole <sup>-1</sup> ,<br>LnA=6.4 s <sup>-1</sup> ,<br>Dimension n=0.9                                                 | E=101.4 kJ·mole <sup>-1</sup> ,<br>LnA=5.3 s <sup>-1</sup> ,<br>Dimension n=0.83                                                |
|       | R <sup>2</sup> | 0.99360                                                                                                                         | 0.9940                                                                                                                          |
|       | F-test         | 3.81                                                                                                                            | 2.096                                                                                                                           |
| R3-R2 | R2             | E=67.6 kJ·mole <sup>-1</sup> ,<br>LnA=3.1 s <sup>-1</sup>                                                                       | E=49.9 kJ·mole <sup>-1</sup> ,<br>LnA=1.5 s <sup>-1</sup>                                                                       |
|       | R3             | E=70.4 kJ·mole <sup>-1</sup> ,<br>LnA=2.5 s <sup>-1</sup>                                                                       | E=62.9 kJ·mole <sup>-1</sup> ,<br>LnA=1.9 s <sup>-1</sup>                                                                       |
|       | R <sup>2</sup> | 0.96777                                                                                                                         | 0.96793                                                                                                                         |
|       | F-test         | 18.929                                                                                                                          | 11.056                                                                                                                          |
| R3-R3 | R2             | E=67 kJ·mole <sup>-1</sup> ,<br>LnA=3 s <sup>-1</sup>                                                                           | E=53.7 kJ·mole <sup>-1</sup> ,<br>LnA=1.8 s <sup>-1</sup>                                                                       |
|       | R3             | E=84 kJ·mole <sup>-1</sup> ,<br>LnA=3.3 s <sup>-1</sup>                                                                         | E=67.7 kJ·mole <sup>-1</sup> ,<br>LnA=2.1 s <sup>-1</sup>                                                                       |
|       | R <sup>2</sup> | 0.98231                                                                                                                         | 0.98203                                                                                                                         |
|       | F-test         | 10.47                                                                                                                           | 6.239                                                                                                                           |
| Fn-R2 | Fn             | E=76.4 kJ·mole <sup>-1</sup> ,<br>LnA=4.4 s <sup>-1</sup> ,                                                                     | E=66.2 kJ·mole <sup>-1</sup> ,<br>LnA=3.2 s <sup>-1</sup> ,                                                                     |

|        |                |                                                                                                       |                                                                                                        |
|--------|----------------|-------------------------------------------------------------------------------------------------------|--------------------------------------------------------------------------------------------------------|
|        |                | ReactOrder n=0.9                                                                                      | ReactOrder n=2.16                                                                                      |
|        | R2             | E=70.4 kJ·mole <sup>-1</sup> ,<br>LnA=2.5 s <sup>-1</sup>                                             | E=87.6 kJ·mole <sup>-1</sup> ,<br>LnA=3.8 s <sup>-1</sup>                                              |
|        | R <sup>2</sup> | 0.96835                                                                                               | 0.98715                                                                                                |
|        | F-test         | 18.602                                                                                                | 4.476                                                                                                  |
| Fn-R3  | Fn             | E=90.2 kJ·mole <sup>-1</sup> ,<br>LnA=5.4 s <sup>-1</sup> ,<br>ReactOrder n=2.6                       | E=62.5 kJ·mole <sup>-1</sup> ,<br>LnA=3.1 s <sup>-1</sup> ,<br>ReactOrder n=1.12                       |
|        | R3             | E=111.8 kJ·mole <sup>-1</sup> ,<br>LnA=5.5 s <sup>-1</sup>                                            | E=71.9 kJ·mole <sup>-1</sup> ,<br>LnA=2.4 s <sup>-1</sup>                                              |
|        | R <sup>2</sup> | 0.99056                                                                                               | 0.98376                                                                                                |
|        | F-test         | 5.611                                                                                                 | 5.646                                                                                                  |
| Bna-R2 | Bna            | E=97.3 kJ·mole <sup>-1</sup> ,<br>LnA=6 s <sup>-1</sup> ,<br>ReactOrder n=4.9,<br>AutocatOrder 0.01   | E=70.1 kJ·mole <sup>-1</sup> ,<br>LnA=3.5 s <sup>-1</sup> ,<br>ReactOrder n=2.8,<br>AutocatOrder 0.01  |
|        | R2             | E=115.1 kJ·mole <sup>-1</sup> ,<br>LnA=5.8 s <sup>-1</sup>                                            | E=93.9 kJ·mole <sup>-1</sup> ,<br>LnA=4.2 s <sup>-1</sup>                                              |
|        | R <sup>2</sup> | 0.94165                                                                                               | 0.98984                                                                                                |
|        | F-test         | 33.849                                                                                                | 3.547                                                                                                  |
| Bna-R3 | Bna            | E=93.4 kJ·mole <sup>-1</sup> ,<br>LnA=5.7 s <sup>-1</sup> ,<br>ReactOrder n=2.9,<br>AutocatOrder 0.01 | E=69.2 kJ·mole <sup>-1</sup> ,<br>LnA=3.5 s <sup>-1</sup> ,<br>ReactOrder n=2.22,<br>AutocatOrder 0.01 |
|        | R3             | E=119.8 kJ·mole <sup>-1</sup> ,<br>LnA=6.1 s <sup>-1</sup>                                            | E= kJ·mole <sup>-1</sup> ,<br>LnA= s <sup>-1</sup>                                                     |
|        | R <sup>2</sup> | 0.99004                                                                                               | 0.99129                                                                                                |
|        | F-test         | 5.925                                                                                                 | 3.042                                                                                                  |

|        |                |                                                                                                                              |                                                                                                                              |
|--------|----------------|------------------------------------------------------------------------------------------------------------------------------|------------------------------------------------------------------------------------------------------------------------------|
| Cnm-R2 | Cnm            | E=82.9 kJ·mole <sup>-1</sup> ,<br>LnA=4.7 s <sup>-1</sup> ,<br>ReactOrder n=2.58,<br>AutocatOrder 0.01,<br>AutocatPower m=10 | E=66.1 kJ·mole <sup>-1</sup> ,<br>LnA=3.2 s <sup>-1</sup> ,<br>ReactOrder n=2.17,<br>AutocatOrder 0.01,<br>AutocatPower m=10 |
|        | R2             | E=105.2 kJ·mole <sup>-1</sup> ,<br>LnA=5.1 s <sup>-1</sup>                                                                   | E=88.2 kJ·mole <sup>-1</sup> ,<br>LnA=3.8 s <sup>-1</sup>                                                                    |
|        | R <sup>2</sup> | 0.98468                                                                                                                      | 0.98721                                                                                                                      |
|        | F-test         | 9.090                                                                                                                        | 4.461                                                                                                                        |
| Cnm-R3 | Cnm            | E=92.2 kJ·mole <sup>-1</sup> ,<br>LnA=5.6 s <sup>-1</sup> ,<br>ReactOrder n=2.6,<br>AutocatOrder 0.01,<br>AutocatPower m=10  | E=62 kJ·mole <sup>-1</sup> ,<br>LnA=2.8 s <sup>-1</sup> ,<br>ReactOrder n=1.1,<br>AutocatOrder 0.01,<br>AutocatPower m= 0.01 |
|        | R3             | E=112.2 kJ·mole <sup>-1</sup> ,<br>LnA=5.5 s <sup>-1</sup>                                                                   | E=71.4 kJ·mole <sup>-1</sup> ,<br>LnA=2.4 s <sup>-1</sup>                                                                    |
|        | R <sup>2</sup> | 0.99045                                                                                                                      | 0.98363                                                                                                                      |
|        | F-test         | 5.680                                                                                                                        | 5.696                                                                                                                        |
| An-R2  | An             | E=87.1 kJ·mole <sup>-1</sup> ,<br>LnA=5.3 s <sup>-1</sup> ,<br>Dimension n=0.91                                              | E=66.5 kJ·mole <sup>-1</sup> ,<br>LnA=3.3 s <sup>-1</sup> ,<br>Dimension n=0.78                                              |
|        | R2             | E=76 kJ·mole <sup>-1</sup> ,<br>LnA=2.9 s <sup>-1</sup>                                                                      | E=70.8 kJ·mole <sup>-1</sup> ,<br>LnA=2.5 s <sup>-1</sup>                                                                    |
|        | R <sup>2</sup> | 0.96904                                                                                                                      | 0.97376                                                                                                                      |
|        | F-test         | 18.207                                                                                                                       | 9.079                                                                                                                        |
| An-R3  | An             | E=89.9 kJ·mole <sup>-1</sup> ,<br>LnA=5.6 s <sup>-1</sup> ,<br>Dimension n=0.9                                               | E=66.9 kJ·mole <sup>-1</sup> ,<br>LnA=3.5 s <sup>-1</sup> ,<br>Dimension n=0.86                                              |
|        | R3             | E=87.5 kJ·mole <sup>-1</sup> ,                                                                                               | E=75.1 kJ·mole <sup>-1</sup> ,                                                                                               |

|  |                |                         |                         |
|--|----------------|-------------------------|-------------------------|
|  |                | LnA=3.6 s <sup>-1</sup> | LnA=2.7 s <sup>-1</sup> |
|  | R <sup>2</sup> | 0.98322                 | 0.98411                 |
|  | F-test         | 9.939                   | 5.524                   |
